1     **Extensive epitranscriptomic methylation of A and C residues on murine leukemia virus**  
2                                   **transcripts enhances viral gene expression**

3

4     David G. Courtney<sup>1</sup>, Andrea Chalem<sup>1</sup>, Hal P. Bogerd<sup>1</sup>, Brittany A. Law<sup>2</sup>, Edward M. Kennedy<sup>1, #</sup>,  
5                                   Christopher L. Holley<sup>2</sup> and Bryan R. Cullen<sup>1,\*</sup>

6     <sup>1</sup>Dept. of Molecular Genetics and Microbiology, Duke University Medical Center, Durham, NC  
7     27710, USA

8     <sup>2</sup>Department of Medicine, Duke University Medical Center, Durham, NC 27710, USA

9     <sup>#</sup>Current address: Oncorus, 50 Hampshire Street, Suite 401, Cambridge MA 02139

10    <sup>\*</sup>Correspondence: [bryan.cullen@duke.edu](mailto:bryan.cullen@duke.edu)

11

## 12 **Abstract**

13           While it has been known for several years that viral RNAs are subject to the addition of  
14 several distinct covalent modifications to individual nucleotides, collectively referred to as  
15 epitranscriptomic modifications, the effect of these editing events on viral gene expression has  
16 been controversial. Here, we report the purification of murine leukemia virus (MLV) genomic  
17 RNA to homogeneity and show that this viral RNA contains levels of  $N^6$ -methyladenosine ( $m^6A$ ),  
18 5-methylcytosine ( $m^5C$ ) and 2'-O-methylated (Nm) ribonucleotides that are an order of  
19 magnitude higher than detected on bulk cellular mRNAs. Mapping of  $m^6A$  and  $m^5C$  residues on  
20 MLV transcripts identified multiple discrete editing sites and allowed the construction of MLV  
21 variants bearing silent mutations that removed a subset of these sites. Analysis of the  
22 replication potential of these mutants revealed a modest but significant attenuation in viral  
23 replication in 3T3 cells in culture. Consistent with a positive role for  $m^6A$  and  $m^5C$  in viral  
24 replication, we also demonstrate that overexpression of the key  $m^6A$  reader protein YTHDF2  
25 enhances MLV replication, while downregulation of the  $m^5C$  writer NSUN2 inhibits MLV  
26 replication.

## 27 **Importance**

28           The data presented in this manuscript demonstrate that MLV RNAs bear an  
29 exceptionally high level of the epitranscriptomic modifications  $m^6A$ ,  $m^5C$  and Nm, thus  
30 suggesting that these each facilitate some aspect of the viral replication cycle. Consistent with  
31 this hypothesis, we demonstrate that mutational removal of a subset of these  $m^6A$  or  $m^5C$   
32 modifications from MLV transcripts inhibits MLV replication *in cis* and a similar result was also  
33 observed upon manipulation of the level of expression of key cellular epitranscriptomic cofactors  
34 *in trans*. Together, these results argue that the addition of several different epitranscriptomic  
35 modifications to viral transcripts stimulates viral gene expression and suggest that MLV has  
36 therefore evolved to maximize the level of these modifications that are added to viral RNAs.

## 37 Introduction

38 Eukaryotic mRNAs are subject to a range of covalent modifications at the single  
39 nucleotide level and it is now evident that these epitranscriptomic modifications can profoundly  
40 affect mRNA function (1-3). While the most prevalent epitranscriptomic mRNA modification  
41 involves methylation of the  $N^6$  position of adenosine ( $m^6A$ ), several other mRNA modifications,  
42 including cytidine methylation ( $m^5C$ ) and 2'-O-methylation of the ribose moiety that forms part of  
43 all four ribonucleotides (Am, Gm, Cm and Um, collectively Nm), have also been reported.

44 Addition of  $m^6A$  is the most intensively studied epitranscriptomic modification and the  
45 protein complex responsible for  $m^6A$  addition, or  $m^6A$  "writer", has been identified as a nuclear  
46 heterotrimer, consisting of the proteins METTL3, METTL14 and WTAP, that adds  $m^6A$  to mRNA  
47 sites bearing the consensus sequence 5'-RA\*C-3', where R is a purine (1-3). Once added,  $m^6A$   
48 can be recognized by several "readers", including the nuclear YTHDC1 and cytoplasmic  
49 YTHDF2 proteins, which then regulate the splicing, translation and/or stability of that mRNA.  
50 Less is known about the  $m^5C$  modification, although NSUN2 has been shown to add  $m^5C$  to a  
51 handful of cellular mRNAs (4-7) and we have recently identified NSUN2 as the primary writer of  
52  $m^5C$  residues on the HIV-1 genome (8).

53 Previously, we reported that  $m^6A$  residues enhance viral gene expression and replication  
54 for HIV-1, influenza A virus and the polyoma virus SV40 (9-11) and others have also reported  
55 that  $m^6A$  residues promote HIV-1 and enterovirus 71 replication (12, 13) and play a role in the  
56 activation of lytic replication in Kaposi's sarcoma herpesvirus (KSHV)-infected cells (14, 15).  
57 More recently, we reported that addition of  $m^5C$  also enhances HIV-1 gene expression (8), and  
58 others have reported that Nm modifications on HIV-1 transcripts promote HIV-1 replication by  
59 inhibiting the detection of viral transcripts by the innate antiviral RNA sensor MDA5 (16).  
60 Consistent with a positive role for these epitranscriptomic modifications in the regulation of viral  
61 replication, we recently reported that HIV-1 transcripts bear a far higher level of  $m^6A$ ,  $m^5C$  and

62 Nm residues than does the average cellular mRNA (8). Here, we extend these earlier findings  
63 by demonstrating that the addition of both m<sup>6</sup>A and m<sup>5</sup>C independently upregulates murine  
64 leukemia virus (MLV) gene expression and replication. Moreover, we further show that MLV  
65 transcripts are also extensively epitranscriptomically modified, with m<sup>6</sup>A, m<sup>5</sup>C and Nm residues  
66 all detected at levels that range from 7 to >20-fold higher than observed on cellular poly(A)+  
67 RNA. Together, these observations are consistent with the hypothesis that sites of  
68 epitranscriptomic modification on viral mRNAs are under positive selection and suggest that  
69 many viruses may have evolved to use epitranscriptomic gene regulation as a mechanism to  
70 promote their replication and, hence, pathogenesis.

## 71 **Results**

### 72 Extensive epitranscriptomic modification of the MLV RNA genome

73 The initial goal of this project was to quantify the epitranscriptomic RNA modifications  
74 present on MLV genomic RNA (gRNA) using ultra-high-performance liquid chromatography and  
75 tandem mass spectrometry (UPLC-MS/MS) (17) (8). This required the purification of the gRNA  
76 away from cellular tRNAs and other ncRNAs that are heavily modified. MLV virions released  
77 into the supernatant media from 3T3 cells infected with MLV derived from the pNCS proviral  
78 plasmid (18) were pelleted through a 20% sucrose cushion followed by banding on a 7.2% to  
79 20% iodixanol gradient, which separates retroviral virions from cellular exosomes and debris  
80 (19). Because MLV virions contain high levels of tRNAs, 7SL RNA and other cellular ncRNAs  
81 (20), isolation of MLV virion particles is necessary but not sufficient to yield pure MLV gRNA.  
82 Therefore, we next isolated total virion RNA, denatured it in urea loading dye and then size  
83 fractionated the RNA by electrophoresis on a 1.5% TBE preparative agarose gel. The ~8kb  
84 MLV gRNA was then visualized and excised. This procedure was performed in triplicate to yield  
85 three independent MLV gRNA preparations.

86 To assess the purity of the MLV gRNA preparations, we performed RNA-seq and then  
87 aligned the reads obtained first to the mouse genome and then to the MLV genome. As shown  
88 in Fig. 1A, 99.48% of the reads obtained from gRNA preparation 1 aligned to the MLV genome,  
89 while only 0.52% aligned to the mouse genome, and closely similar results were obtained for  
90 MLV gRNA preparations 2 and 3. These data also revealed that the MLV-specific reads  
91 obtained aligned to the entire MLV genome (Fig. 1B). We next quantified the precise level of  
92 several epitranscriptomic modifications on the MLV RNA genome using UPLC-MS/MS, as  
93 previously described (17). Quantification of the level of multiple epitranscriptomic modifications  
94 across the three MLV gRNA preparations revealed a high level of reproducibility (Figs. 1C and  
95 1D). These data also revealed a particularly high level of m<sup>6</sup>A (~51 m<sup>6</sup>A residues per gRNA) as  
96 well as high levels of 2'-O-methylated adenosine (Am), guanosine (Gm) and cytosine (Cm) (~27,  
97 ~25 and ~18 residues, respectively, per gRNA), as well as a high level of m<sup>5</sup>C (~13 residues per  
98 gRNA). These levels are considerably higher than previously reported for cellular poly(A)+ RNA  
99 (2, 21) (8). Specifically, the level of m<sup>6</sup>A reported for both human and murine poly(A)+ RNA is  
100 ~0.35% of "A" residues, while ~2.4% of all "A" residues in the MLV genome are m<sup>6</sup>A (Fig. 1D). It  
101 has also been reported that ~0.06% of all "C" residues in poly(A)+ RNA are modified to m<sup>5</sup>C,  
102 compared to ~0.54% of "C" residues in the MLV gRNA (Fig. 1D). Similarly, Am, Gm and Cm  
103 represent from 0.74% to 1.25% of their cognate residue in the MLV genome, while we have  
104 previously reported that these 2'-O-Me-modified nucleotides each represent <0.1% of the A, G  
105 and C residues present on cellular poly(A)+ RNA (8). We therefore conclude that m<sup>6</sup>A, m<sup>5</sup>C,  
106 Am, Gm and Cm are all highly overrepresented on MLV gRNAs, when compared to the average  
107 cellular mRNA.

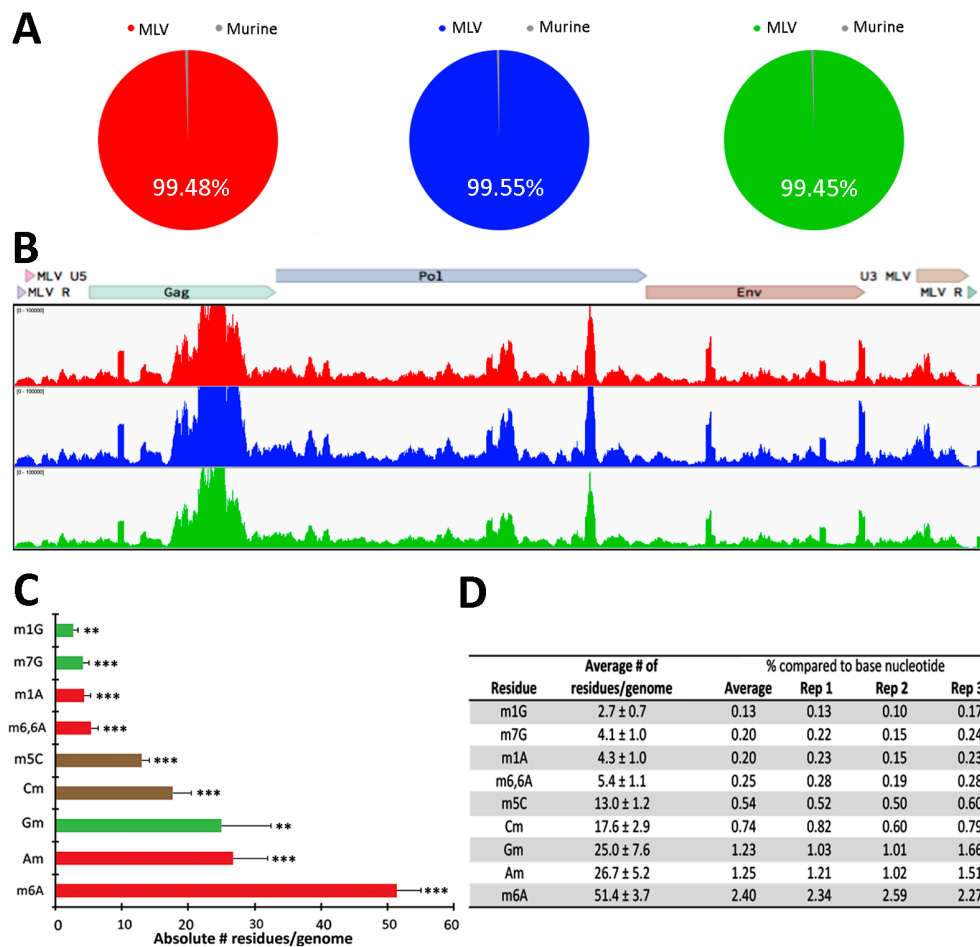

108

109 **Figure 1. Extensive epitranscriptomic modifications of MLV gRNAs.** (A) Alignment of the  
 110 RNA-seq reads obtained from the three MLV gRNA preparations to the MLV or mouse genome.  
 111 (B) Alignment of RNA-seq reads from the three MLV gRNA preparations to the MLV genome,  
 112 demonstrating coverage of the entire MLV genome. (C) Quantification of the absolute number of  
 113 nine different RNA modifications on MLV gRNA, as determined by UPLC-MS/MS analysis of  
 114 three independent gRNA samples, with SD indicated. \*\*,  $p < 0.01$ ; \*\*\*,  $p < 0.001$ . (D) Table of the  
 115 UPLC-MS/MS data described in panel C, showing the percentage abundance of each  
 116 modification in comparison to the parental nucleotide for each replicate, with good concordance  
 117 between samples.

118

119           While our data identify the five epitranscriptomic modifications listed above as unusually  
120 prevalent on MLV gRNA, with >10 modified residues of each per gRNA, we also detected  
121 several other modified nucleotides at levels ranging from ~2.7 to ~5.4 residues per MLV  
122 genome (Figs. 1C and 1D). In the case of 1-methylguanosine (m<sup>1</sup>G) and 7-methylguanosine  
123 (m<sup>7</sup>G), the observed levels in the MLV genome are comparable to levels detected previously in  
124 cellular poly(A)<sup>+</sup> RNA (22) (8). However, this is not true for N<sup>6</sup>,N<sup>6</sup>-dimethyladenosine (m<sup>6,6</sup>A),  
125 which represents ~0.25% of all A residues in the MLV gRNA, versus ~0.037% in total poly(A)<sup>+</sup>  
126 RNA, a difference of ~7-fold. Similarly, 1-methyladenosine (m<sup>1</sup>A) was detected at an ~22-fold  
127 higher level on MLV gRNAs than detected on cellular poly(A)<sup>+</sup> RNA (0.20% vs. 0.009%) (8).  
128 However, as these four residues are all present at very low levels on MLV gRNAs (Fig. 1C), it is  
129 unclear whether they exert any phenotypic effect. While we did not detect any  
130 epitranscriptomically modified “U” residues, such as 2’O-Me-uridine (Um) or pseudouridine, we  
131 note that the UPLC-MS/MS method is less sensitive for detecting modified uridines at low  
132 concentrations of input RNA, as in this case, due to the comparatively inefficient ionization of  
133 uridine compared to other ribonucleosides. Nevertheless, our data do suggest that levels of Um  
134 in the MLV gRNA are <1nM, which equates to <20 Um residues per MLV gRNA.

### 135 Mapping of m<sup>6</sup>A and m<sup>5</sup>C residues on the MLV RNA genome

136           Having demonstrated that MLV gRNAs bear a substantial number of m<sup>6</sup>A and m<sup>5</sup>C  
137 residues, we wished to map these residues not only on the gRNA but also on MLV RNAs  
138 expressed in infected 3T3 cells. For this purpose, we infected 3T3 cells with MLV virions  
139 rescued from the pNCS proviral clone (18) and, at 48 hours post-infection (hpi), pulsed the cells  
140 with the highly photoreactive uridine analog 4-thiouridine (4SU) for a further 24 h (23). We then  
141 isolated MLV virions, as described above, from the supernatant media of MLV-infected 3T3 cells  
142 and purified total virion RNA. In parallel, we also harvested total RNA from MLV-infected 3T3  
143 cells and subjected this RNA to a single round of poly(A)<sup>+</sup> isolation to enrich for mRNAs. The

144 MLV virion and MLV-infected cell RNA preparations were then subjected to the previously  
145 described PA-m<sup>6</sup>A-seq or PA-m<sup>5</sup>C-seq procedures (24) (8). Briefly, the purified 4SU-labeled  
146 RNAs were incubated with an antibody specific for either m<sup>6</sup>A or m<sup>5</sup>C and then UV-irradiated to  
147 crosslink the antibody to the bound site. The resultant RNA:protein complexes were then  
148 incubated with RNase T1, to remove unbound RNA, and the bound ~20 nt RNA fragments  
149 recovered, converted to cDNA and subjected to deep sequencing. As may be observed in Fig.  
150 2A, we detected several m<sup>6</sup>A peaks on the MLV gRNA, almost all of which were also observed  
151 on the MLV transcripts expressed in infected 3T3 cells. Consistent with the fact that all MLV  
152 virion RNAs are genome length, while ~50% of the MLV transcripts expressed in infected cells  
153 are *env* mRNAs that have been spliced to remove the Gag and Pol open reading frames  
154 (ORFs), we detected a 2-3-fold lower level of m<sup>6</sup>A binding sites in the MLV *gag* and *pol* genes,  
155 when compared to the *env* gene and LTR, in the intracellular RNA sample (Fig. 2A). While our  
156 UPLC-MS/MS data indicate that each MLV gRNA contains ~51 m<sup>6</sup>A residues (Fig. 1D), we only  
157 detected ~20 major m<sup>6</sup>A sites using the PA-m<sup>6</sup>A-seq technique. While the reasons for this  
158 discrepancy are unclear, we note that it has been recently reported that m<sup>6</sup>A residues  
159 embedded in duplex RNA are not readily detected by m<sup>6</sup>A-specific antibodies (25).  
160 Nevertheless, this discrepancy does suggest that the m<sup>6</sup>A sites that were detected on the MLV  
161 RNA genome are likely to be heavily modified.



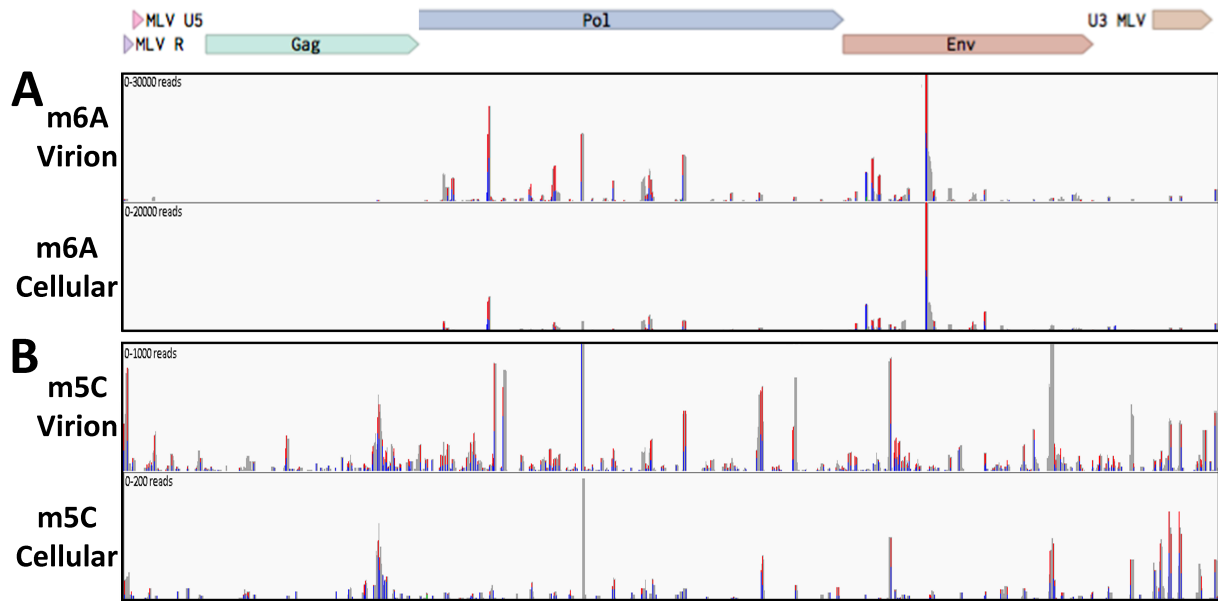

162

163 **Figure 2. Mapping of m<sup>6</sup>A and m<sup>5</sup>C residues on infected cell and virion-derived MLV**

164 **RNAs.** (A) The m<sup>6</sup>A residues located on MLV gRNA isolated from virions (top lane), or from  
165 MLV RNAs isolated from infected 3T3 cells (bottom lane), were mapped using the antibody-  
166 based PA-m<sup>6</sup>A-seq technique. (B) The m<sup>5</sup>C residues on MLV gRNA isolated from virions (top  
167 lane), or from viral transcripts expressed in MLV-infected 3T3 cells (bottom lane), were mapped  
168 using the antibody-based PA-m<sup>5</sup>C-seq technique. Blue peaks, single T to C conversion, red  
169 peaks, more than one T to C conversion.

170 The PA-m<sup>5</sup>C-seq technique also mapped a substantial number of m<sup>5</sup>C residues on the  
171 MLV genome and, as expected, revealed minimal overlap with the mapped m<sup>6</sup>A sites (Fig. 2B).  
172 We again detected a higher level of antibody binding in the gag/pol region of the MLV genome  
173 in the virion-derived RNA sample than in the intracellular MLV RNA, although this varied  
174 somewhat by peak. In contrast to the PA-m<sup>6</sup>A-seq data, which identified somewhat fewer m<sup>6</sup>A  
175 modification sites on the MLV gRNA than predicted by the UPLC-MS/MS data, the PA-m<sup>5</sup>C-seq  
176 data detected ~40 m<sup>5</sup>C sites on the MLV gRNA (Fig. 2B), which is more than the ~13 sites

177 predicted by the UPLC-MS/MS technique (Fig. 1D), thus suggesting that most of these m<sup>5</sup>C  
178 sites are likely to be only partially modified.

### 179 Epitranscriptomic addition of m<sup>6</sup>A and m<sup>5</sup>C facilitates MLV gene expression

180 One way to test whether the addition of m<sup>6</sup>A or m<sup>5</sup>C has any effect on MLV gene  
181 expression and replication is to mutate the locations of these modifications by, for example,  
182 changing mapped m<sup>6</sup>A residues to “G” residues and mapped m<sup>5</sup>C residues to “U” residues. In  
183 the case of m<sup>6</sup>A, the modified “A” is found in the context of the sequence 5'-RA\*C-3', where R is  
184 a purine (1), so modified “A” residues are easier to identify within the ~20 nt peaks mapped in  
185 Fig. 2A. Nevertheless, many peaks do contain more than one 5'-RA\*C-3' consensus sequence.  
186 In contrast, m<sup>5</sup>C modifications on mRNAs do not occur in a sequence consensus (8), so there  
187 are generally multiple “C” residues within each of the m<sup>5</sup>C peaks mapped in Fig. 2B. This  
188 complicates the design of MLV mutants lacking specific m<sup>6</sup>A or m<sup>5</sup>C sites, as interpretation of  
189 the results obtained requires that all the introduced mutations are silent, which in practice  
190 means located in the wobble position of codons.

191 In the case of m<sup>6</sup>A, it proved impossible to design silent mutations that would ablate  
192 most of the m<sup>6</sup>A sites mapped in Fig. 2A, though this was possible for all three of the 5'-RA\*C-3'  
193 motifs found in one of the most prominent peaks, in the MLV *env* gene, to generate the MLV-  
194 Δm<sup>6</sup>A mutant (indicated by # in Fig. 3A, lane 1). In the case of m<sup>5</sup>C, we were fortunate that four  
195 prominent m<sup>5</sup>C peaks located in the MLV *pol* gene (indicated by # in Fig. 3A, lane 3) could be  
196 silently mutated in the context of the pNLS proviral expression vector to generate the MLV-  
197 Δm<sup>5</sup>C mutant.

198 To confirm that these introduced mutations indeed resulted in the loss of the predicted  
199 modified residues, we rescued the pNCS-based MLV-Δm<sup>6</sup>A and MLV-Δm<sup>5</sup>C mutants by  
200 transfection into 293T cells followed by culture in susceptible 3T3 cells. We then performed PA-

201 m<sup>6</sup>A-seq and PA-m<sup>5</sup>C-seq using intracellular RNA preparations derived from 4SU-pulsed 3T3  
 202 cells infected with wild type MLV, or the MLV-Δm<sup>6</sup>A or MLV-Δm<sup>5</sup>C mutants. As shown in Fig. 3A  
 203 (upper two panels), the mutations introduced into the MLV-Δm<sup>6</sup>A mutant, indicated by #,  
 204 resulted in the precise loss of the predicted major m<sup>6</sup>A peak, while other peaks were unaffected.  
 205 In the case of the MLV-Δm<sup>5</sup>C mutant, the four introduced mutations not only ablated the four  
 206 targeted peaks in the MLV *pol* gene (indicated by # in the lower two panels of Fig. 3A) but also  
 207 seemed to result in an overall reduction in m<sup>5</sup>C addition, even at sites that were not altered. The  
 208 reasons for this effect are not clear, but it could imply that m<sup>5</sup>C addition to RNAs, unlike m<sup>6</sup>A  
 209 addition, is in some way cooperative.

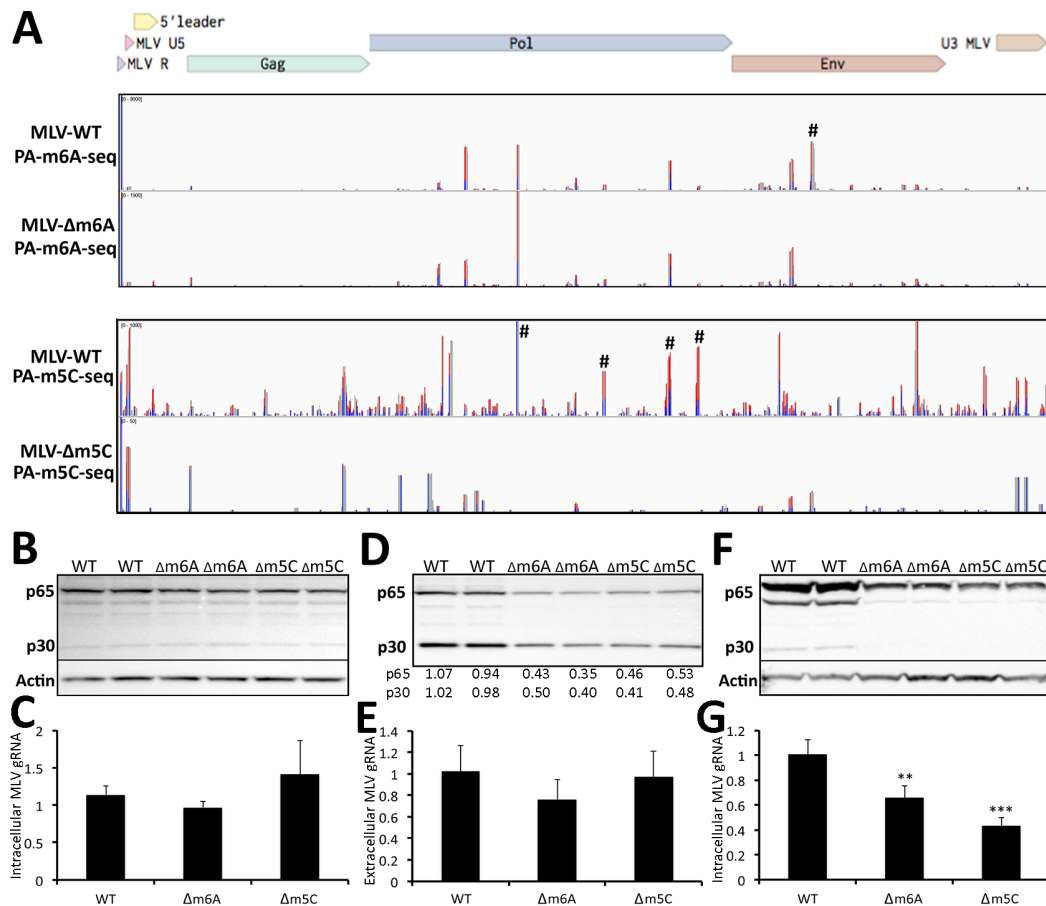

210

211 **Figure 3. Loss of m<sup>6</sup>A or m<sup>5</sup>C residues on MLV RNAs reduces MLV gene expression.**

212 (A) Alignment of PA- m<sup>6</sup>A -seq reads to intracellular MLV RNA isolated from 3T3 cells infected

213 with wild-type MLV (first lane) or the MLV- $\Delta m^6A$  mutant (second lane), Similarly, this figure also  
214 shows an alignment of PA- $m^5C$ -seq reads to intracellular MLV RNAs expressed in 3T3 cells  
215 infected with wild-type MLV (third lane) or MLV- $\Delta m^5C$  (fourth lane). # denotes peaks where  
216 silent mutations were introduced to ablate specific  $m^6A$  or  $m^5C$  addition sites. (B) Western blot  
217 of the MLV Gag proteins p65 and p30 expressed from wild type MLV, MLV- $\Delta m^6A$  or MLV- $\Delta m^5C$   
218 in 293T cells transfected with wildtype or mutant pNCS-based plasmids, at 72 h post-  
219 transfection. Representative assays are shown in duplicate. (C) qPCR of MLV RNA in total RNA  
220 isolated from 293T cells transfected with wild type MLV, MLV- $\Delta m^6A$  or MLV- $\Delta m^5C$  at 72 h post-  
221 transfection, normalized to GAPDH mRNA. Average of three independent experiments with SD  
222 indicated. (D) Western blot of the MLV Gag proteins p65 and p30 from virions isolated from  
223 equal amounts of the supernatant media from 293T cells expressing wild type MLV, MLV- $\Delta m^6A$   
224 or MLV- $\Delta m^5C$ , as shown in panel B. Band intensities were quantified by ImageJ and normalized  
225 to the average level seen with wild type MLV, with numbers given below the panel.  
226 Representative assays are shown in duplicate. (E) qPCR quantification of MLV gRNA prepared  
227 from virions isolated from the supernatant media of 293T cells expressing wild type MLV, MLV-  
228  $\Delta m^6A$  or MLV- $\Delta m^5C$ , and normalized to 7SL RNA. These are the same virions analyzed in panel  
229 D. Average of three independent experiments with SD indicated. (F) Western blot of the MLV  
230 Gag proteins p65 and p30 isolated from 3T3 cells infected with equal amounts of wild type MLV,  
231 MLV- $\Delta m^6A$  or MLV- $\Delta m^5C$ , as determined in panel D, at 72 hpi. Representative assays are  
232 shown in duplicate. (G) qPCR quantification of MLV gRNA from the same 3T3 cells shown in  
233 panel F, infected with equal amounts of wild type MLV, MLV- $\Delta m^6A$  or MLV- $\Delta m^5C$  MLV,  
234 normalized to cellular GAPDH mRNA. Average of three independent experiments with SD  
235 indicated. \*\*,  $p < 0.01$ ; \*\*\*,  $p < 0.001$ .

236 Next, we assessed whether the introduced mutations affected MLV gene expression  
237 and/or replication. For this purpose, we transfected 293T cells with the wild type MLV proviral

238 expression vector pNCS, or with the pNCS- $\Delta m^6A$  or pNCS- $\Delta m^5C$  mutant plasmids. We detected  
239 comparable levels of MLV Gag production in the transfected 293T cells (Fig. 3B), as well as  
240 similar levels of MLV gRNA expression (Fig. 3C). However, analysis of the supernatant media  
241 revealed that the MLV- $\Delta m^6A$  mutant released 2-3-fold less MLV Gag protein into the  
242 supernatant media, and 293T cells transfected with the MLV- $\Delta m^5C$  mutant also released ~2-fold  
243 less MLV Gag protein (Fig. 3D). One possibility we considered is that the mutations present in  
244 the MLV- $\Delta m^6A$  or MLV- $\Delta m^5C$  mutant might affect gRNA packaging into MLV virion particles. To  
245 address this, we performed qRT-PCR to measure the level of MLV gRNA isolated from the  
246 supernatant media of the transfected 293T cells and then normalized these data by qRT-PCR  
247 analysis of the level of cellular 7SL RNA, which is known to also be selectively packaged into  
248 MLV virions (20). As shown in Fig. 3E, this analysis did not reveal any reduced packaging into  
249 virions of the MLV gRNA produced by the MLV- $\Delta m^6A$  or MLV- $\Delta m^5C$  mutants, although clearly  
250 fewer virions were released (Fig. 3D).

251 Next, we normalized the MLV-containing supernatants obtained from the transfected  
252 293T cells, using the MLV Gag quantitations shown in Fig. 3D, and then used equal amounts of  
253 each MLV variant to infect susceptible 3T3 cells. At 72 hpi, we harvested these infected cells  
254 and analyzed MLV Gag protein expression (Fig. 3F) and gRNA expression (Fig. 3G). As may be  
255 observed, we detected a significant reduction in the level of both Gag protein and MLV gRNA in  
256 the cultures infected with the MLV- $\Delta m^6A$  and MLV- $\Delta m^5C$  mutant, though this effect was only 2-  
257 3-fold. We note, however, that as these mutants retain a substantial number of  $m^6A$  and  $m^5C$   
258 sites, a modest phenotype is not unexpected. Nevertheless, these data are clearly consistent  
259 with the hypothesis that the  $m^6A$  and  $m^5C$  epitranscriptomic modifications detected on MLV  
260 transcripts are both able to facilitate some aspect of MLV replication.

261 While the mutations introduced into the MLV- $\Delta m^6A$  and MLV- $\Delta m^5C$  mutants are  
262 designed to be silent and to not impact sequences with a known regulatory role, it remains

263 possible that they could affect an important RNA structure or protein binding site unrelated to  
 264 the targeted RNA modifications. We therefore wished to test whether inhibition of m<sup>6</sup>A or m<sup>5</sup>C  
 265 addition, or their enhanced detection by cellular readers, might also impact MLV gene  
 266 expression. Previously, we reported that overexpression of the key cellular m<sup>6</sup>A reader YTHDF2  
 267 increases viral gene expression for three distinct viral species, viz. HIV-1, influenza A virus and  
 268 the SV40 (9-11), and we therefore asked whether stable overexpression of murine YTHDF2 in  
 269 3T3 cells would also enhance MLV gene expression. For this purpose, we generated clonal 3T3  
 270 cell lines transduced with a lentiviral vector expressing either FLAG-tagged YTHDF2 or GFP  
 271 and selected single cell clones expressing readily detectable levels of these proteins (Fig. 4A).  
 272 We then infected these cells with wild type MLV and assessed viral gene expression at 48 and  
 273 72 hpi by Western blot for MLV p65 Gag. As shown in Fig. 4A, YTHDF2 overexpression indeed  
 274 resulted in a readily detectable increase in MLV Gag expression, thus again arguing that m<sup>6</sup>A  
 275 addition to MLV transcripts facilitates viral gene expression and replication.

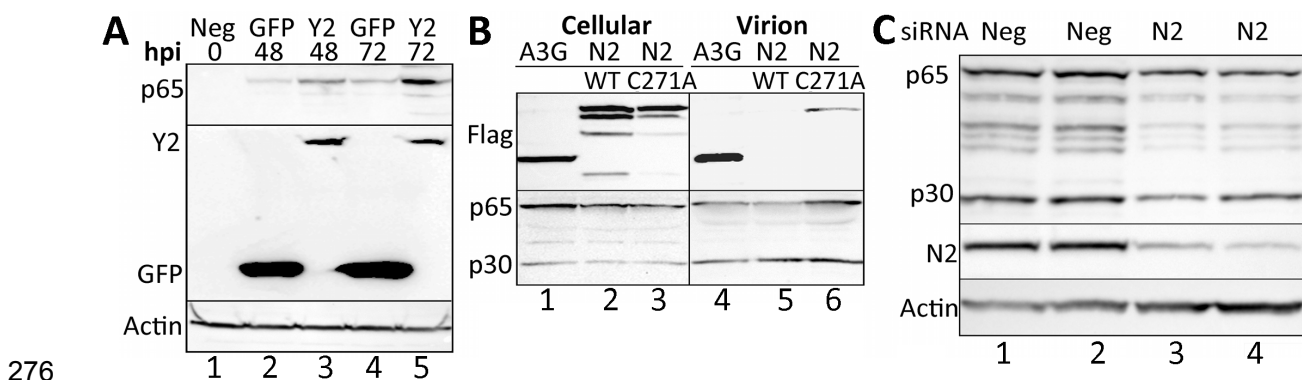

276

277 **Figure 4. Alteration of m<sup>6</sup>A or m<sup>5</sup>C machinery affects MLV protein levels.** (A) Stable  
 278 overexpression of murine YTHDF2 in 3T3 cells increases MLV Gag protein expression at both  
 279 48 and 72 hpi, when compared to control, GFP-overexpressing 3T3 cells. Y2; YTHDF2.  
 280 (B) Transient overexpression of APOBEC3G (A3G), wild type NSUN2 (N2) or NSUN2-C271A in  
 281 MLV-expressing 293T cells. All three overexpressed proteins are present in the intracellular  
 282 lysate but only A3G and the mutant NSUN2-C271A are detectably packaged into MLV virions. A

283 representative experiment is shown. (C) siRNA knockdown of NSUN2 (N2) in 293T cells  
284 expressing full-length MLV reduces the expression of the MLV Gag proteins. Representative  
285 assays are shown in duplicate.

286 While the proteins that “write” and “read” m<sup>6</sup>A modifications are well defined, this is less  
287 clear for the m<sup>5</sup>C modification as several cytidine methyltransferases have been described.  
288 However, the cellular protein NSUN2 has previously been reported to add m<sup>5</sup>C to specific  
289 cellular mRNAs (4-7) and we have recently reported that NSUN2 is primarily responsible for the  
290 addition of m<sup>5</sup>C modifications to HIV-1 transcripts (8). An interesting aspect of NSUN2 is that it  
291 forms a transient covalent bond with the “C” residues it is methylating and release requires the  
292 action of a conserved cysteine residue located at position 271 in NSUN2. As a result,  
293 mutagenesis of cysteine 271 to alanine (C271A) leads to the spontaneous formation of NSUN2  
294 crosslinks to target “C” residues on RNAs (6). Therefore, in cells expressing NSUN2-C271A, we  
295 predicted that this mutant protein would crosslink to MLV gRNA and potentially be packaged  
296 into MLV virions. As shown in Fig. 4B, we indeed observed packaging of the NSUN2-C271A  
297 mutant, but not wild type NSUN2, into MLV virions produced in transfected 293T cells, thus not  
298 only identifying NSUN2 as an enzyme that adds m<sup>5</sup>C to MLV gRNAs but also, more generally,  
299 confirming that MLV gRNAs do indeed bear “C” residues that are methylated in producer cells.

300 We next asked in reduced expression of NSUN2 would result in a reduction in MLV gene  
301 expression. This was achieved by the efficient knockdown of NSUN2 expression using RNA  
302 interference (RNAi), as shown in Fig. 4C. Importantly, knockdown of NSUN2 expression in 3T3  
303 cells also resulted in a marked drop in the expression of the MLV Gag proteins (Fig. 4C).  
304 Therefore, consistent with the data presented in Fig. 3, these results argue that addition of m<sup>5</sup>C,  
305 like addition of m<sup>6</sup>A, to MLV transcripts enhances MLV RNA expression.

306 **Discussion**

307           Previously, we and others have reported that the addition of m<sup>6</sup>A facilitates viral gene  
308 expression and replication for a range of distinct viruses, including HIV-1, influenza A virus,  
309 SV40, enterovirus 71 and KSHV (9-15). More recently, we have also presented evidence  
310 indicating that m<sup>5</sup>C promotes HIV-1 mRNA translation and gene expression (8), while others  
311 have reported that Nm residues on HIV-1 transcripts promote HIV-1 replication by inhibiting  
312 activation of the innate antiviral RNA sensor MDA5 (16). Together, these observations indicate  
313 that at least a subset of the epitranscriptomic modifications found on mRNAs, specifically m<sup>6</sup>A,  
314 m<sup>5</sup>C and Nm, each acts as a positive regulator of some aspect of the viral replication cycle and  
315 should therefore be selected for during viral evolution. Consistent with this hypothesis, we  
316 recently reported that m<sup>6</sup>A, m<sup>5</sup>C and Nm ribonucleotides were all present at substantially higher  
317 levels on the HIV-1 RNA genome than on poly(A)+ RNA isolated from human cells, with m<sup>5</sup>C  
318 (~20x higher) and Nm (11-28x higher) being particularly enriched (8).

319           Despite the evidence delineated above arguing for a positive role for at least some  
320 epitranscriptomic modifications in the viral life cycle, this issue has remained controversial.  
321 Specifically, one group has argued that m<sup>6</sup>A actually inhibits HIV-1 gene replication (26) and  
322 others have suggested that m<sup>6</sup>A modification of flaviviral transcripts, including Zika virus RNAs,  
323 inhibited some aspect of the viral replication cycle (27, 28). Why a rapidly evolving, lytically  
324 replicating virus, such as Zika virus, should retain m<sup>6</sup>A sites if these inhibit virus replication *in cis*  
325 was not, however, investigated.

326           In this manuscript, we have sought to shed further light on the role of epitranscriptomic  
327 modifications in regulating viral gene expression and replication, and we present three lines of  
328 evidence arguing that m<sup>6</sup>A, m<sup>5</sup>C and Nm ribonucleotides indeed exert a positive effect on the  
329 replication of the retrovirus MLV when present *in cis* on viral RNAs. Firstly, we demonstrate that  
330 MLV genomic RNAs are subject to exceptionally high levels of modification by addition of m<sup>6</sup>A,



331 m<sup>5</sup>C and Nm, with observed levels that are from 7 to >20-fold higher than observed in cellular  
332 poly(A)+ RNA (Fig. 1). Secondly, we mapped several sites of m<sup>6</sup>A and m<sup>5</sup>C addition on MLV  
333 transcripts and then mutationally ablated a small number of these by the introduction of silent  
334 mutations (Figs. 2 and 3). While these two mutant viruses, termed MLV-Δm<sup>6</sup>A and MLV-Δm<sup>5</sup>C,  
335 retained the majority of their m<sup>6</sup>A and m<sup>5</sup>C residues, we nevertheless observed a modest but  
336 significant reduction in viral protein and RNA expression in infected 3T3 cells (Fig. 3). Finally,  
337 we asked whether overexpression of the key m<sup>6</sup>A reader YTHDF2, or downregulation of the  
338 m<sup>5</sup>C writer NSUN2, would affect MLV gene expression. Indeed, and as previously also reported  
339 for HIV-1 (8, 9), we observed enhanced MLV gene expression upon overexpression of murine  
340 YTHDF2 (Fig. 4A), and a substantial decline in MLV gene expression in 3T3 cells upon  
341 downregulation of NSUN2 expression using RNAi (Fig. 4C). These MLV data therefore confirm  
342 and extend our previously reported results, generated using HIV-1 (9) (8), indicating that m<sup>6</sup>A  
343 and m<sup>5</sup>C are positive regulators of viral gene expression and further argue that MLV, like HIV-1  
344 and likely many other virus species, has evolved to use the epitranscriptomic writers and  
345 readers expressed by infected cells as a way to increase viral gene expression and replication.  
346 It will therefore be of interest to investigate whether any viruses have also evolved the ability to  
347 upregulate the expression of these proteins.

## 348 **Materials & Methods**

### 349 **Plasmids and cDNA cloning**

350 A lentiviral vector was used to generate a clonal 3T3-derived cell line stably expressing  
351 FLAG-tagged mouse YTHDF2. Briefly, the mouse *ythdf2* gene (NP\_663368) was PCR amplified  
352 from a cDNA library and cloned into the pLEX vector (9) 5' to an internal ribosome entry site  
353 (IRES) and the puromycin (*puro*) resistance gene, all driven by the CMV immediate early  
354 promoter. A previously described (9) pLEX-based lentiviral vector expressing FLAG-tagged  
355 green fluorescent protein (GFP) was used as a control. A FLAG-tagged murine NSUN2

356 (NP\_060225) expression plasmid was generated by PCR amplification of an NSUN2 cDNA that  
357 was then cloned into the pcDNA3.1 expression plasmid to generate pcDNA-FLAG-NSUN2. A  
358 mutant form of NSUN2 was generated by introducing the C271A mutation into pcDNA-FLAG-  
359 NSUN2. The NSUN2-C271A mutant spontaneously forms stable covalent bonds with target  
360 cytosines on RNA (6). The pcDNA-based expression plasmid ph3G-HA, expressing an HA-  
361 epitope tagged form of human APOBEC3G (A3G) has been described (29). Here, we  
362 substituted the FLAG epitope tag for HA to generate ph3G-FLAG.

363 The pNCS MLV proviral expression vector has been described and was a gift from Dr.  
364 Stephen Goff (18). Two MLV mutant clones were generated, one mutated to remove a single  
365 m<sup>6</sup>A site ( $\Delta$ m<sup>6</sup>A) and the second mutated to remove 4 m<sup>5</sup>C sites ( $\Delta$ m<sup>5</sup>C). Only silent mutations  
366 were introduced at these sites. Two DNA gBlocks were synthesized by IDT containing these  
367 silent mutations, and cloned into pNCS to generate pNCS- $\Delta$ m<sup>6</sup>A and pNCS- $\Delta$ m<sup>5</sup>C, respectively.  
368 Mutations introduced into pNCS- $\Delta$ m<sup>6</sup>A are as follows; counting from the start codon of Env, with  
369 introduced mutations indicated in lower case letters:

370 nt 354 5'-GAAGAgCCTctcACCTCC-3'.

371 Mutations introduced into pNCS- $\Delta$ m<sup>5</sup>C are as follows; counting from the start codon of Gag, with  
372 introduced mutations again indicated in lower case letters:

373 nt 2898 5'-GGtTTtTGTaGatTaTGGATt-3',

374 nt 3645 5'-agtGCTCAGaGaGCTGAAtTGATAGCAtTgACT-3',

375 nt 4242 5'-aGAACAtTaAAAAATAttACTGAGACtTgt-3' and

376 nt 4500 5'-ATtTTtCCtAGGTTt-3'. Clone integrity was verified by Sanger sequencing.

### 377 **MLV infections**

378 To generate infectious MLV, pNCS-based proviral expression vectors (18) were  
379 transfected into 293T cells (CRL-3216; ATCC) using polyethyleneimine (PEI). At 24 h post-  
380 transfection, supernatant media were exchanged for fresh media. At 72 h post-transfection, the  
381 supernatant media containing infectious MLV virions were passed through a 0.45 µm filter and  
382 then used for infection of 3T3 cells.

### 383 **MLV gRNA purification**

384 MLV virions were purified by a two-step method, as previously described (19). Briefly,  
385 the supernatant media from MLV-infected 3T3 cells were harvested at 72 hpi, passed through a  
386 0.45 µm filter and the virions then pelleted through a 20% sucrose cushion by  
387 ultracentrifugation. The virion pellet was resuspended and layered onto a 7.2% to 20% iodixanol  
388 gradient (OptiPrep, Axis-Shield) prior to ultracentrifugation, to separate virions from cellular  
389 debris and exosomes. The virion band was then harvested and total RNA extracted using  
390 TRIzol. The isolated RNA was heat denatured in a loading buffer containing urea, and run on a  
391 preparative 1.5% TBE agarose gel. An RNA band of ~8kb, corresponding in size to the MLV  
392 gRNA, was visualized and excised and RNA isolated using acid phenol followed by phenol-  
393 chloroform extraction. The bulk of the purified MLV RNA was then used for UPLC-MS/MS  
394 analysis of RNA modifications while a small aliquot was retained for RNA-seq analysis, which  
395 was used to determine the purity of the MLV gRNA sample. RNA-seq was performed using the  
396 SMARTer® Stranded Total RNA-Seq Kit v2 (NEB) following the manufacturer's instructions.

### 397 **RNA modification identification by UPLC-MS/MS**

398 Nucleosides were generated from purified MLV RNA by nuclease P1 digestion (Sigma)  
399 in buffer containing 25 mM NaCl and 2.5 mM ZnCl<sub>2</sub> for 2 h at 37°C, followed by incubation with  
400 Antarctic Phosphatase (NEB) for an additional 2 h at 37°C (30). Nucleosides were separated

401 and quantified using UPLC-MS/MS as previously described (17), except acetic acid was used in  
402 place of formic acid. Triplicate MLV gRNA samples were assessed by this method.

### 403 **PA-antibody-seq**

404 PA-m<sup>6</sup>A-seq and PA-m<sup>5</sup>C-seq were performed as previously described (8-10). Briefly,  
405 3T3 cells were infected with MLV as described above. At 48 hpi, cells were pulsed with 100 mM  
406 4-thiouridine (4SU). After a further 24 h, total cellular RNA was extracted from the MLV-infected  
407 3T3 cells using TRIzol, while MLV gRNA was extracted from virions that were collected by  
408 ultracentrifugation of the supernatant media through a 20% sucrose cushion. Total cellular  
409 poly(A)+ RNA was purified using oligo-dT magnetic beads (AM1922; Invitrogen) and 10 µg of  
410 poly(A)+ RNA or virion gRNA was then used following the previously reported PA-m<sup>6</sup>A-seq  
411 protocol (10, 24) using either an m<sup>6</sup>A-specific (202111; Synaptic Systems) or m<sup>5</sup>C-specific  
412 (C15200081; Diagenode) polyclonal antibody.

### 413 **NSUN2 packaging into virions**

414 Plasmids expressing FLAG-tagged versions of the wild type or C271A mutant form of  
415 murine NSUN2, or human A3G, were co-transfected with pNCS into 293T cells using PEI. At 72  
416 h post-transfection, the supernatant media were passed through 0.45µm filters and virions  
417 harvested by ultracentrifugation through a 20% sucrose cushion. Protein was extracted from the  
418 virion pellet in Laemmli buffer (31) before analysis by Western blot. Protein from producer cells  
419 was also harvested in Laemmli buffer to demonstrate protein expression from the transfected  
420 plasmids.

### 421 **Western blots**

422 Proteins were extracted using Laemmli buffer, sonicated and denatured at 95°C for 10  
423 min and then separated on Tris-Glycine-SDS polyacrylamide gels (Invitrogen). After  
424 electrophoresis, proteins were transferred to a nitrocellulose membrane, and then blocked in 5%

425 milk in PBS + 0.1% Tween. Membranes were incubated in primary and secondary antibodies  
426 diluted in 5% milk in PBS + 0.1% Tween for 1 h each and then washed in PBS + 0.1% Tween.  
427 Each antibody was used at a 1:5000 dilution. The antibody targeting MLV Gag has been  
428 described (32) and was a gift from Dr. Stephen Goff. Antibodies targeting Actin (60008;  
429 Proteintech), NSUN2 (20854; Proteintech) and the FLAG epitope tag (F1804; Sigma), as well as  
430 anti-mouse HRP (A9044; Sigma) and anti-rabbit HRP (A6154; Sigma), were also used. Western  
431 blot signals were visualized by chemiluminescence. Image J was used for quantification of the  
432 intensity of protein bands.

### 433 **siRNA transfections**

434 To investigate the effect of reduced NSUN2 protein levels on MLV protein expression,  
435 RNAi was utilized to knockdown NSUN2 expression in 293T cells. An siRNA specific to NSUN2  
436 (siNSUN2), or a control siRNA (SR310319; Origene), was transfected into 293T cells at a  
437 concentration of 25 pmol/ml using Lipofectamine RNAiMAX (Invitrogen). At 48 h post-  
438 transfection, cells underwent a second siRNA transfection and were then incubated for a further  
439 24 h. Cells were then transfected with pNCS. At 72 h post-transfection, the cells were harvested  
440 for Western blot analysis.

### 441 **YTDHF2 overexpression in 3T3 cells**

442 The lentiviral expression vectors pLEX-GFP and pLEX-YTHDF2 were transfected into  
443 293T cells along with the packaging plasmids pMD2G (12259; Addgene) and p $\Delta$ 8.74 (22036;  
444 Addgene). Media were changed at 24 h post-transfection. At 72 h post-transfection the  
445 supernatant media containing the lentiviral particles was harvested and passed through a 0.45  
446  $\mu$ m filter and overlaid on 3T3 cells (CRL-1658; ATCC). At 48 hpi, transduced 3T3 cells were  
447 selected by the addition of puromycin to the culture media. After a further 72 h, cells were single  
448 cell cloned, expanded and assessed by Western blot for FLAG-GFP or FLAG-YTHDF2

449 expression. A single clone was then selected to determine the effect of overexpression of  
450 YTHDF2 on MLV infection. The GFP or YTHDF2 overexpressing cell lines were infected with  
451 MLV and at 72 hpi protein was harvested for Western blot analysis.

#### 452 **Quantitative real-time PCR**

453 Relative MLV gRNA expression levels were determined by qRT-PCR. The level of  
454 GAPDH mRNA was used to normalize all cellular qRT-PCR experiments, while 7SL RNA, which  
455 is packaged by MLV virions (20), was used to normalize virion qRT-PCR experiments. All primer  
456 sequences are listed below. RNA was extracted using the TRIzol method. cDNA was generated  
457 using the Ambion cDNA synthesis kit with random primers, following the manufacturer's  
458 protocol. All qRT-PCR experiments were performed using Thermo Fisher's Power Sybr Green  
459 PCR Master Mix (4367659; ABI) following the manufacturer's instructions. All qRT-PCR data  
460 were quantified using the  $\Delta\Delta CT$  method.

461 The primers sequences for GAPDH mRNA detection were as follows:

462 GAPDH Forward: 5'-TGGGTGTGAACCATGAGAAG-3',

463 GAPDH Reverse: 5'-GATGGCATGGACTGTGGTC-3',

464 The primers used for MLV genomic RNA detection were as follows:

465 MLV gag Forward: 5'-AGGAATAACACAAGGGCCCA-3',

466 MLV gag Reverse: 5'-GGGTCCTCAGGGTCATAAGG-3',

467 The primers used for human 7SL RNA detection were as follows:

468 7SL Forward: 5'GTGCGGACACCCGATCGGCA-3',

469 7SL Reverse: 5'-TGAGGCTGGAGGATCGCTTGAG-3'.

470 **Bioinformatic analysis**

471 Read alignments were performed using Bowtie (33). Reads were first aligned to the  
472 mouse genome, allowing up to 1 mismatch, then unaligned reads were aligned to the pNCS  
473 MLV transcriptome, again allowing up to 1 mismatch. At least one characteristic T to C  
474 mutation, resulting from 4SU incorporation and crosslinking to the antibody used, were required  
475 in both mouse and viral aligned reads. All data was processed using in-house Perl scripts and  
476 Samtools (34), and visualized with IGV, as previously described (10). The raw sequencing data  
477 obtained by RNA-seq have been submitted to the NCBI expression omnibus and are available  
478 under GenBank accession number GE (in process)

479 **Acknowledgments**

480 This research was funded in part by NIH grants R01-DA046111, R56-AI124973 and  
481 U54-GM103297 to B.R.C. D.G.C. was funded by Marie-Skłodowska Curie Global Fellowship  
482 MSCA-IF-GF:747810. We thank the Duke Proteomics and Metabolomics Shared Resource,  
483 which performed mass spectrometry, and the Duke Center for Genomic and Computational  
484 Biology, which performed sequencing. We also thank Dr Stephen Goff for the gift of the pNCS  
485 MLV proviral expression plasmid and the MLV-Gag-specific antiserum.

486 D.G.C., A.C., H.P.B., B.A.L. and E.M.K. performed the experiments; D.G.C and E.M.K.  
487 analyzed the RNA-seq data; D.R.C. and B.R.C. wrote the manuscript and C.L.H. and B.R.C.  
488 oversaw the project.

489

490 **References**

- 491 1. **Meyer KD, Jaffrey SR.** 2014. The dynamic epitranscriptome: N6-methyladenosine and  
492 gene expression control. *Nat Rev Mol Cell Biol* **15**:313-326.
- 493 2. **Roundtree IA, Evans ME, Pan T, He C.** 2017. Dynamic RNA modifications in gene  
494 expression regulation. *Cell* **169**:1187-1200.
- 495 3. **Gilbert WV, Bell TA, Schaening C.** 2016. Messenger RNA modifications: Form,  
496 distribution, and function. *Science* **352**:1408-1412.
- 497 4. **Yang X, Yang Y, Sun BF, Chen YS, Xu JW, Lai WY, Li A, Wang X, Bhattarai DP,**  
498 **Xiao W, Sun HY, Zhu Q, Ma HL, Adhikari S, Sun M, Hao YJ, Zhang B, Huang CM,**  
499 **Huang N, Jiang GB, Zhao YL, Wang HL, Sun YP, Yang YG.** 2017. 5-methylcytosine  
500 promotes mRNA export - NSUN2 as the methyltransferase and ALYREF as an m5C  
501 reader. *Cell Res* **27**:606-625.
- 502 5. **Zhang X, Liu Z, Yi J, Tang H, Xing J, Yu M, Tong T, Shang Y, Gorospe M, Wang W.**  
503 2012. The tRNA methyltransferase NSun2 stabilizes p16INK(4) mRNA by methylating  
504 the 3'-untranslated region of p16. *Nat Commun* **3**:712.
- 505 6. **Hussain S, Sajini AA, Blanco S, Dietmann S, Lombard P, Sugimoto Y, Paramor M,**  
506 **Gleeson JG, Odom DT, Ule J, Frye M.** 2013. NSun2-mediated cytosine-5 methylation  
507 of vault noncoding RNA determines its processing into regulatory small RNAs. *Cell Rep*  
508 **4**:255-261.
- 509 7. **Squires JE, Patel HR, Nousch M, Sibbritt T, Humphreys DT, Parker BJ, Suter CM,**  
510 **Preiss T.** 2012. Widespread occurrence of 5-methylcytosine in human coding and non-  
511 coding RNA. *Nucleic Acids Res* **40**:5023-5033.
- 512 8. **Courtney DG, Tsai K, Bogerd HP, Kennedy EM, Law BA, Emery A, Swanstrom R,**  
513 **Holley CL, Cullen BR.** 2019. Epitranscriptomic Regulation of HIV-1 Gene Expression by



- 514 m5C and the Novel m5C Reader MBD2. Available at SSRN:  
515 <https://ssrn.com/abstract=3334977>.
- 516 9. **Kennedy EM, Bogerd HP, Kornepati AV, Kang D, Ghoshal D, Marshall JB, Poling**  
517 **BC, Tsai K, Gokhale NS, Horner SM, Cullen BR.** 2016. Posttranscriptional m(6)A  
518 editing of HIV-1 mRNAs enhances viral gene expression. *Cell Host Microbe* **19**:675-685.
- 519 10. **Courtney DG, Kennedy EM, Dumm RE, Bogerd HP, Tsai K, Heaton NS, Cullen BR.**  
520 2017. Epitranscriptomic enhancement of influenza A virus gene expression and  
521 replication. *Cell Host Microbe* **22**:377-386 e375.
- 522 11. **Tsai K, Courtney DG, Cullen BR.** 2018. Addition of m6A to SV40 late mRNAs  
523 enhances viral structural gene expression and replication. *PLoS Pathog* **14**:e1006919.
- 524 12. **Lichinchi G, Gao S, Saletore Y, Gonzalez GM, Bansal V, Wang Y, Mason CE, Rana**  
525 **TM.** 2016. Dynamics of the human and viral m6A RNA methylomes during HIV-1  
526 infection of T cells. *Nature Microbiology* **1**:16011.
- 527 13. **Hao H, Hao S, Chen H, Chen Z, Zhang Y, Wang J, Wang H, Zhang B, Qiu J, Deng F,**  
528 **Guan W.** 2019. N6-methyladenosine modification and METTL3 modulate enterovirus 71  
529 replication. *Nucleic Acids Res* **47**:362-374.
- 530 14. **Ye F, Chen ER, Nilsen TW.** 2017. Kaposi's Sarcoma-Associated Herpesvirus Utilizes  
531 and Manipulates RNA N6-Adenosine Methylation To Promote Lytic Replication. *J Virol*  
532 **91**.
- 533 15. **Hesser CR, Karijolich J, Dominissini D, He C, Glaunsinger BA.** 2018. N6-  
534 methyladenosine modification and the YTHDF2 reader protein play cell type specific  
535 roles in lytic viral gene expression during Kaposi's sarcoma-associated herpesvirus  
536 infection. *PLoS Pathog* **14**:e1006995.
- 537 16. **Ringgaard M, Marchand V, Decroly E, Motorin Y, Bennasser Y.** 2019. FTSJ3 is an  
538 RNA 2'-O-methyltransferase recruited by HIV to avoid innate immune sensing. *Nature*  
539 **565**:500-504.

- 540 17. **Basanta-Sanchez M, Temple S, Ansari SA, D'Amico A, Agris PF.** 2016. Attomole  
541 quantification and global profile of RNA modifications: Epitranscriptome of human neural  
542 stem cells. *Nucleic Acids Res* **44**:e26.
- 543 18. **Gao G, Goff SP.** 1998. Replication defect of moloney murine leukemia virus with a  
544 mutant reverse transcriptase that can incorporate ribonucleotides and  
545 deoxyribonucleotides. *J Virol* **72**:5905-5911.
- 546 19. **Bogerd HP, Kennedy EM, Whisnant AW, Cullen BR.** 2017. Induced packaging of  
547 cellular microRNAs into HIV-1 virions can inhibit infectivity. *mBio* **8**:e02125-02116.
- 548 20. **Onafuwa-Nuga AA, King SR, Telesnitsky A.** 2005. Nonrandom packaging of host  
549 RNAs in moloney murine leukemia virus. *J Virol* **79**:13528-13537.
- 550 21. **Li Q, Li X, Tang H, Jiang B, Dou Y, Gorospe M, Wang W.** 2017. NSUN2-Mediated  
551 m5C Methylation and METTL3/METTL14-Mediated m6A Methylation Cooperatively  
552 Enhance p21 Translation. *J Cell Biochem* **118**:2587-2598.
- 553 22. **Li X, Xiong X, Yi C.** 2016. Epitranscriptome sequencing technologies: decoding RNA  
554 modifications. *Nat Methods* **14**:23-31.
- 555 23. **Hafner M, Landthaler M, Burger L, Khorshid M, Hausser J, Berninger P, Rothballer  
556 A, Ascano M, Jr., Jungkamp AC, Munschauer M, Ulrich A, Wardle GS, Dewell S,  
557 Zavolan M, Tuschl T.** 2010. Transcriptome-wide identification of RNA-binding protein  
558 and microRNA target sites by PAR-CLIP. *Cell* **141**:129-141.
- 559 24. **Chen K, Lu Z, Wang X, Fu Y, Luo GZ, Liu N, Han D, Dominissini D, Dai Q, Pan T, He  
560 C.** 2015. High-resolution N(6)-methyladenosine (m(6)A) map using photo-crosslinking-  
561 assisted m(6)A sequencing. *Angew Chem Int Ed Engl* **54**:1587-1590.
- 562 25. **Liu B, Merriman DK, Choi SH, Schumacher MA, Plangger R, Kreutz C, Horner SM,  
563 Meyer KD, Al-Hashimi HM.** 2018. A potentially abundant junctional RNA motif stabilized  
564 by m(6)A and Mg(2). *Nat Commun* **9**:2761.

- 565 26. **Tirumuru N, Zhao BS, Lu W, Lu Z, He C, Wu L.** 2016. N(6)-methyladenosine of HIV-1  
566 RNA regulates viral infection and HIV-1 Gag protein expression. *Elife* **5**.
- 567 27. **Gokhale NS, McIntyre AB, McFadden MJ, Roder AE, Kennedy EM, Gandara JA,**  
568 **Hopcraft SE, Quicke KM, Vazquez C, Willer J, Ilkayeva OR, Law BA, Holley CL,**  
569 **Garcia-Blanco MA, Evans MJ, Suthar MS, Bradrick SS, Mason CE, Horner SM.**  
570 2016. N6-methyladenosine in Flaviviridae viral RNA genomes regulates infection. *Cell*  
571 *Host Microbe* **20**:654-665.
- 572 28. **Lichinchi G, Zhao BS, Wu Y, Lu Z, Qin Y, He C, Rana TM.** 2016. Dynamics of human  
573 and viral RNA methylation during Zika virus infection. *Cell Host Microbe* **20**:666-673.
- 574 29. **Bogerd HP, Doehle BP, Wiegand HL, Cullen BR.** 2004. A single amino acid difference  
575 in the host APOBEC3G protein controls the primate species specificity of HIV type 1  
576 virion infectivity factor. *Proc Natl Acad Sci U S A* **101**:3770-3774.
- 577 30. **Dominissini D, Nachtergaele S, Moshitch-Moshkovitz S, Peer E, Kol N, Ben-Haim**  
578 **MS, Dai Q, Di Segni A, Salmon-Divon M, Clark WC, Zheng G, Pan T, Solomon O,**  
579 **Eyal E, Hershkovitz V, Han D, Dore LC, Amariglio N, Rechavi G, He C.** 2016. The  
580 dynamic N(1)-methyladenosine methylome in eukaryotic messenger RNA. *Nature*  
581 **530**:441-446.
- 582 31. **Laemmli UK.** 1970. Cleavage of structural proteins during the assembly of the head of  
583 bacteriophage T4. *Nature* **227**:680-685.
- 584 32. **Rodriguez JJ, Goff SP.** 2010. Xenotropic murine leukemia virus-related virus  
585 establishes an efficient spreading infection and exhibits enhanced transcriptional activity  
586 in prostate carcinoma cells. *J Virol* **84**:2556-2562.
- 587 33. **Langmead B, Trapnell C, Pop M, Salzberg SL.** 2009. Ultrafast and memory-efficient  
588 alignment of short DNA sequences to the human genome. *Genome Biol* **10**:R25.

- 589 34. **Li H, Handsaker B, Wysoker A, Fennell T, Ruan J, Homer N, Marth G, Abecasis G,**  
590 **Durbin R, Genome Project Data Processing S.** 2009. The Sequence Alignment/Map  
591 format and SAMtools. *Bioinformatics* **25**:2078-2079.
- 592
